# Supplementary material for: Oxysterols Versus Cholesterol in Model Neuronal Membrane. I. The Case of 7-Ketocholesterol. The Langmuir Monolayer Study
Source: PubMed Central journal article supplement (PMC5613072; doi:10.1007/s00232-017-9984-8), 2017-08-31
Supplement: 232_2017_9984_MOESM1_ESM.pdf [file 232_2017_9984_MOESM1_ESM.pdf]

## Supplementary Material 1

The Journal of Membrane Biology

Oxysterols *versus* cholesterol in model neuronal membrane. I. The case of 7-ketocholesterol.  
The Langmuir monolayer study

Anita Wnętrzak, Katarzyna Makyła-Juzak, Anna Filiczowska, Waldemar Kulig,  
Patrycja Dynarowicz-Łątka\*

\*Corresponding author: [ucdynaro@cyf-kr.edu.pl](mailto:ucdynaro@cyf-kr.edu.pl)

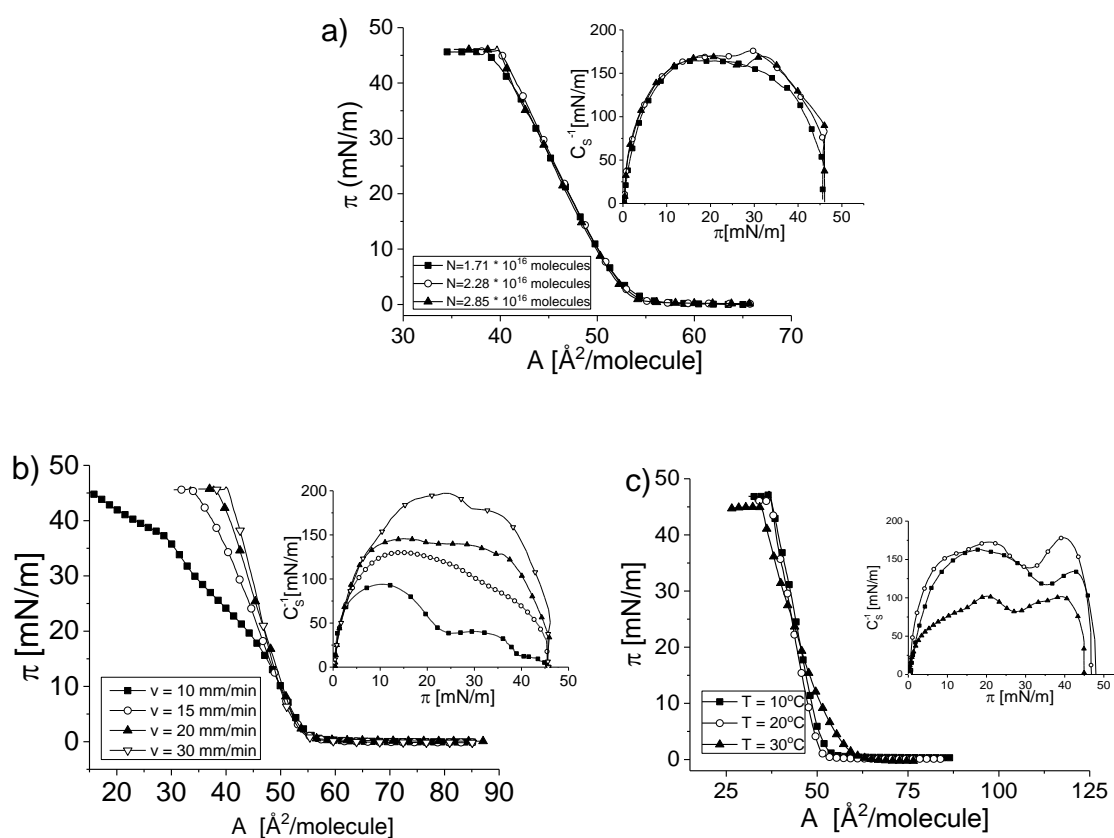

**Fig. S1** The influence of experimental conditions on the  $\pi$ -A isotherms of 7-KC: number of molecules (a), compression rate (b), temperature of subphase (c). Inset: compression modulus ( $C_s^{-1}$ ) – surface pressure ( $\pi$ ) dependencies.
